# Supplementary material for: Reproducibly creating hierarchical 3D carbon to study the effect of Si surface functionalization on the oxygen reduction reaction
Source: Royal Society of Chemistry journal article supplement (doi:10.1039/c6nr02825j), 2016-01-01
Supplement: c6nr02825j1.pdf [file c6nr02825j1.pdf]

# Reproducibly Creating Hierarchical 3D Carbon to Study the Effect of Si Surface Functionalization on Oxygen Reduction Reaction

*Yuze Zeng, Jose F. Flores, Yu-Cheng Shao, Jinghua Guo, Yi-De Chuang, Jennifer Q. Lu\**

School of Engineering, University of California, Merced, Merced, California 95343,  
United States

\* Address correspondence to [jlu5@ucmerced.edu](mailto:jlu5@ucmerced.edu)

## SUPPORTING INFORMATION

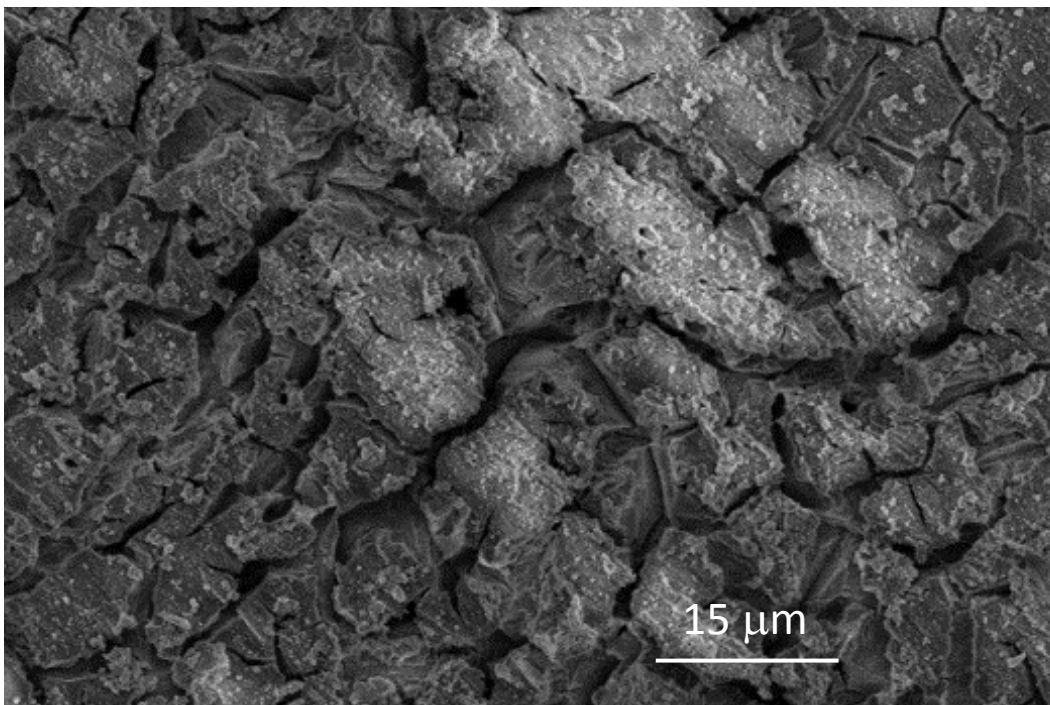

**Figure S1.** SEM image of the SS316 surface after physical roughening and chemical etching.

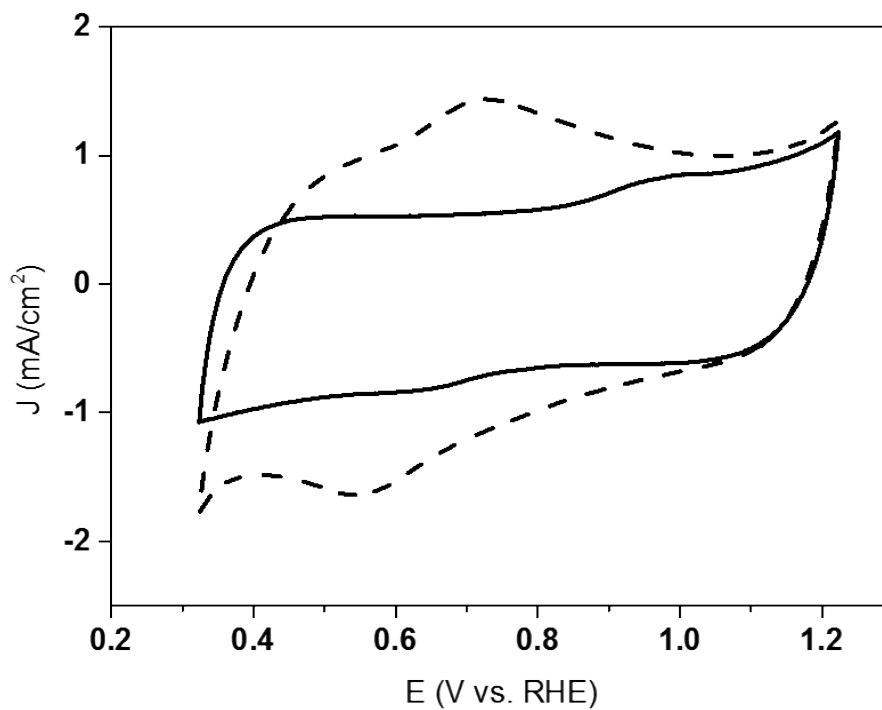

**Figure S2.** Cyclic voltammetry measurements conducted in 0.1 M KOH solution under saturated  $N_2$  at a scan rate of 20 mV/s. Solid line: CNF-AG. Dashed line: CNF after acid treatment.

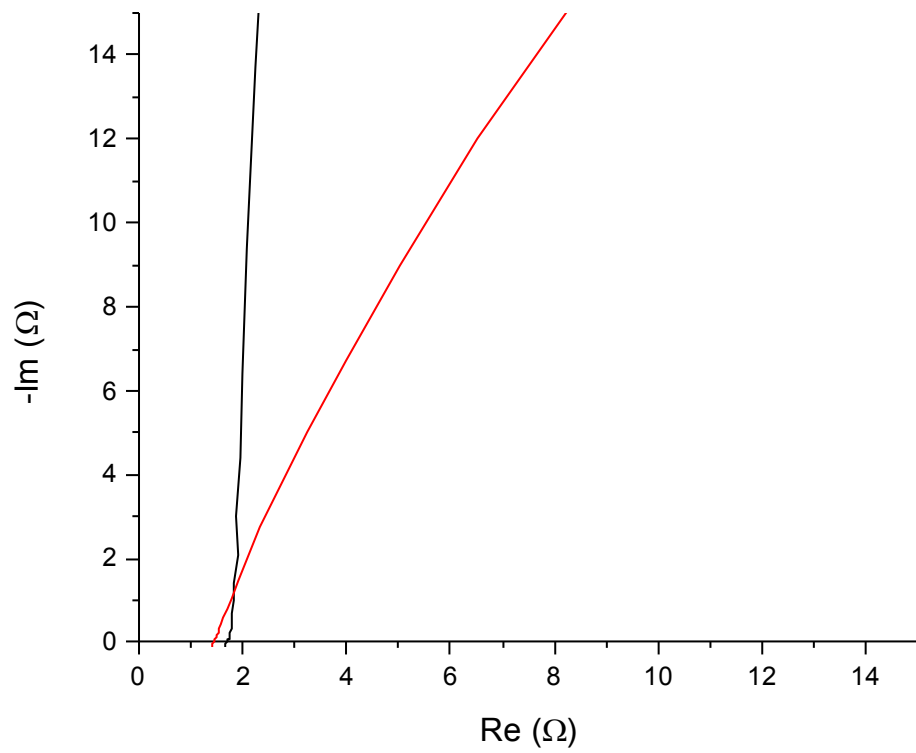

**Figure S3.** Electrochemical impedance spectra. Red line: SS 316 Black line: CNF-AG

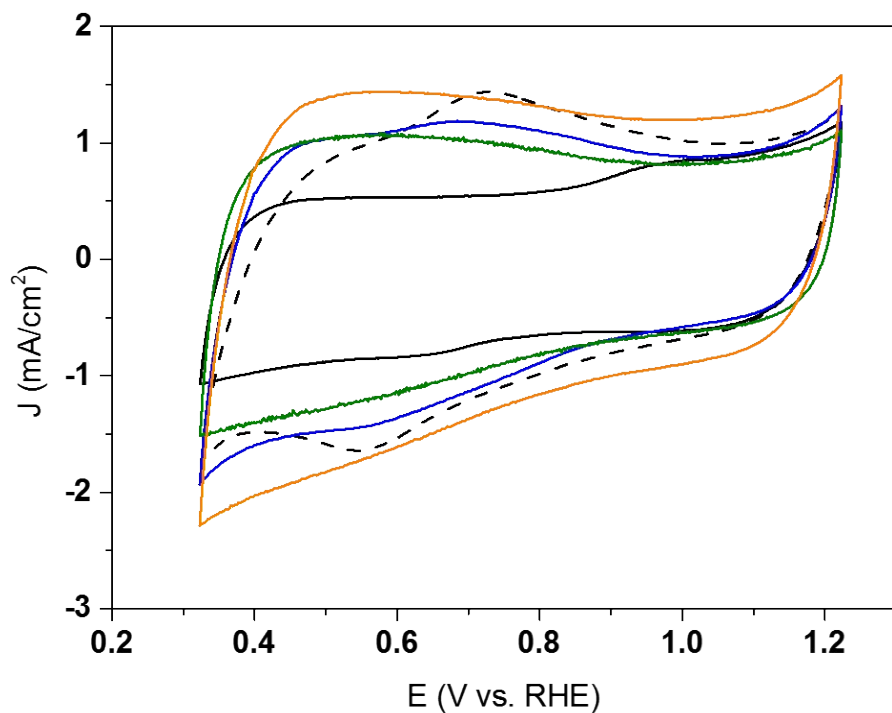

**Figure S4.** Cyclic voltammety measurements conducted in 0.1 M KOH solution under saturated  $N_2$  at a scan rate of 20 mV/s. Black solid line: CNF-AG. Black dashed line: CNF after acid treatment. Blue solid line: acid treated CNF with Si grafting (CNF-Si). Green solid line: CNF-500. Orange solid line: CNF-Si-500.

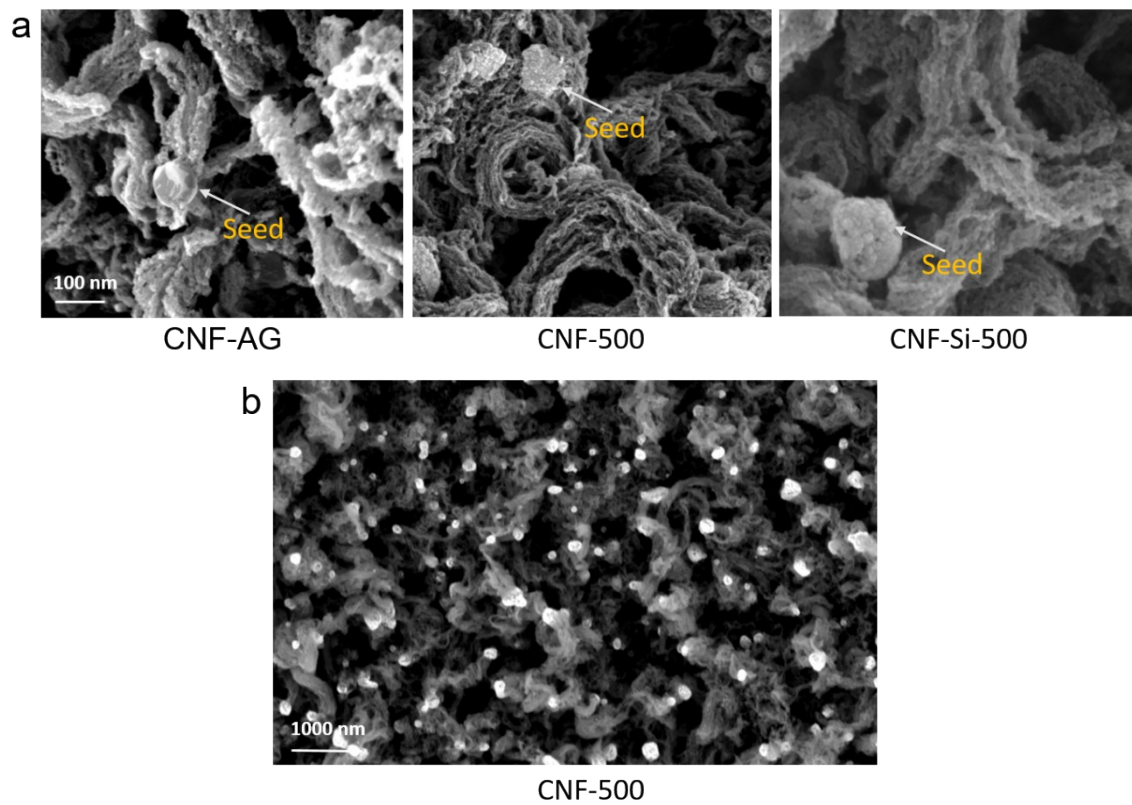

**Figure S5.** (a) Secondary SEM images. Scale bar: 100 nm. (b) Composite image of secondary and backscattering SEM showing metal seeds in high contrast. Scale bar: 1000 nm.

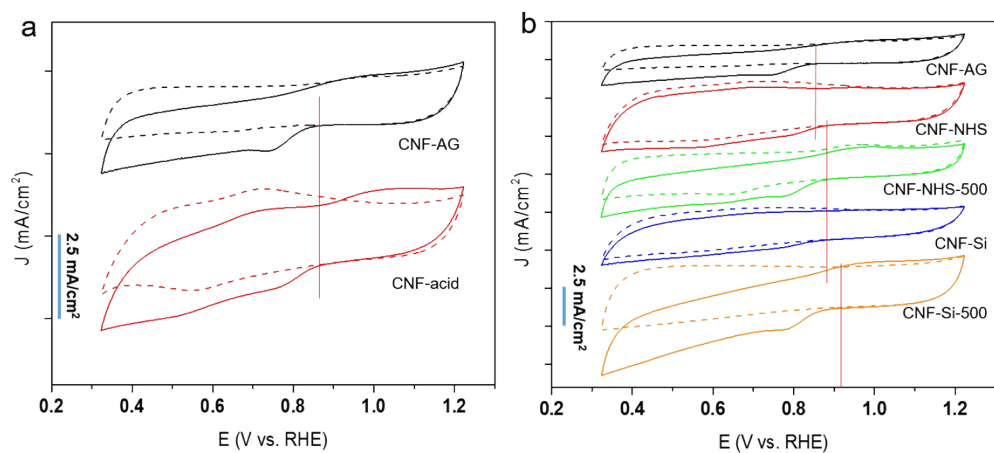

**Figure S6.** CV results of the CNFs with various treatments. Dashed lines were collected under saturated N<sub>2</sub>. Solid lines were collected under saturated O<sub>2</sub>. Red vertical lines delineate the onset potential of the ORR.

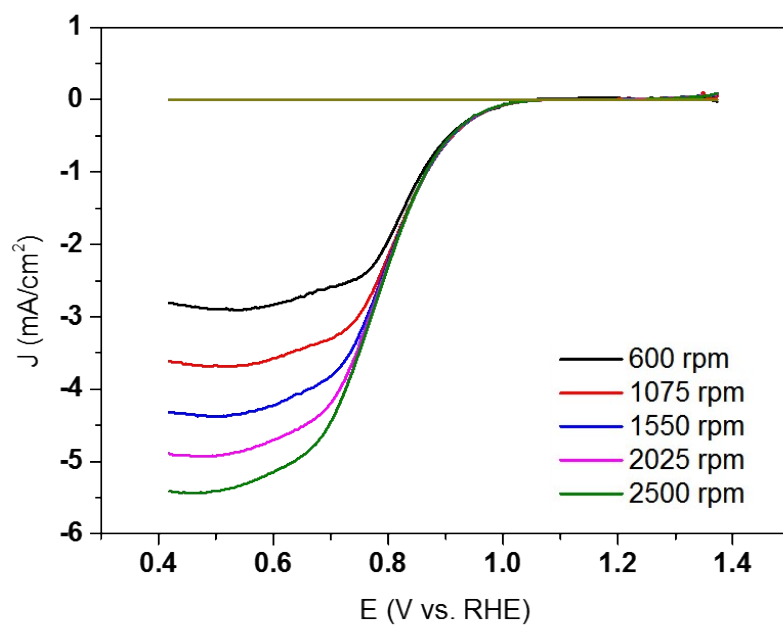

**Figure S7.** RRDE measurements of the commercial Pt/C catalyst conducted in 0.1 M KOH solution at a scan rate of 10 mV/s. The mass loading of the catalyst was 0.15 mg/cm<sup>2</sup>.



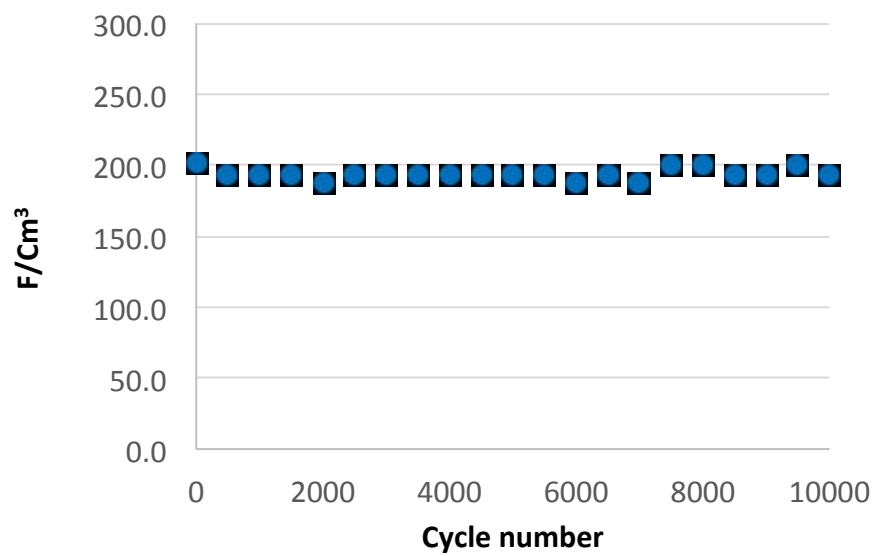

**Figure S8.** Change of electrochemical surface areas in 2 M HClO<sub>4</sub> 2 mV/sec.
